# Supplementary figures and images for: Synthesis, characterization of silicon(iv) compounds containing 2-alkyl-aminopyridine ligands and evaluation of them as CVD precursors
Source: Royal Society of Chemistry journal article supplement (doi:10.1039/c5ra07045g), 2015-01-01

NMR Copies for **2a-2f**:

**2a:**

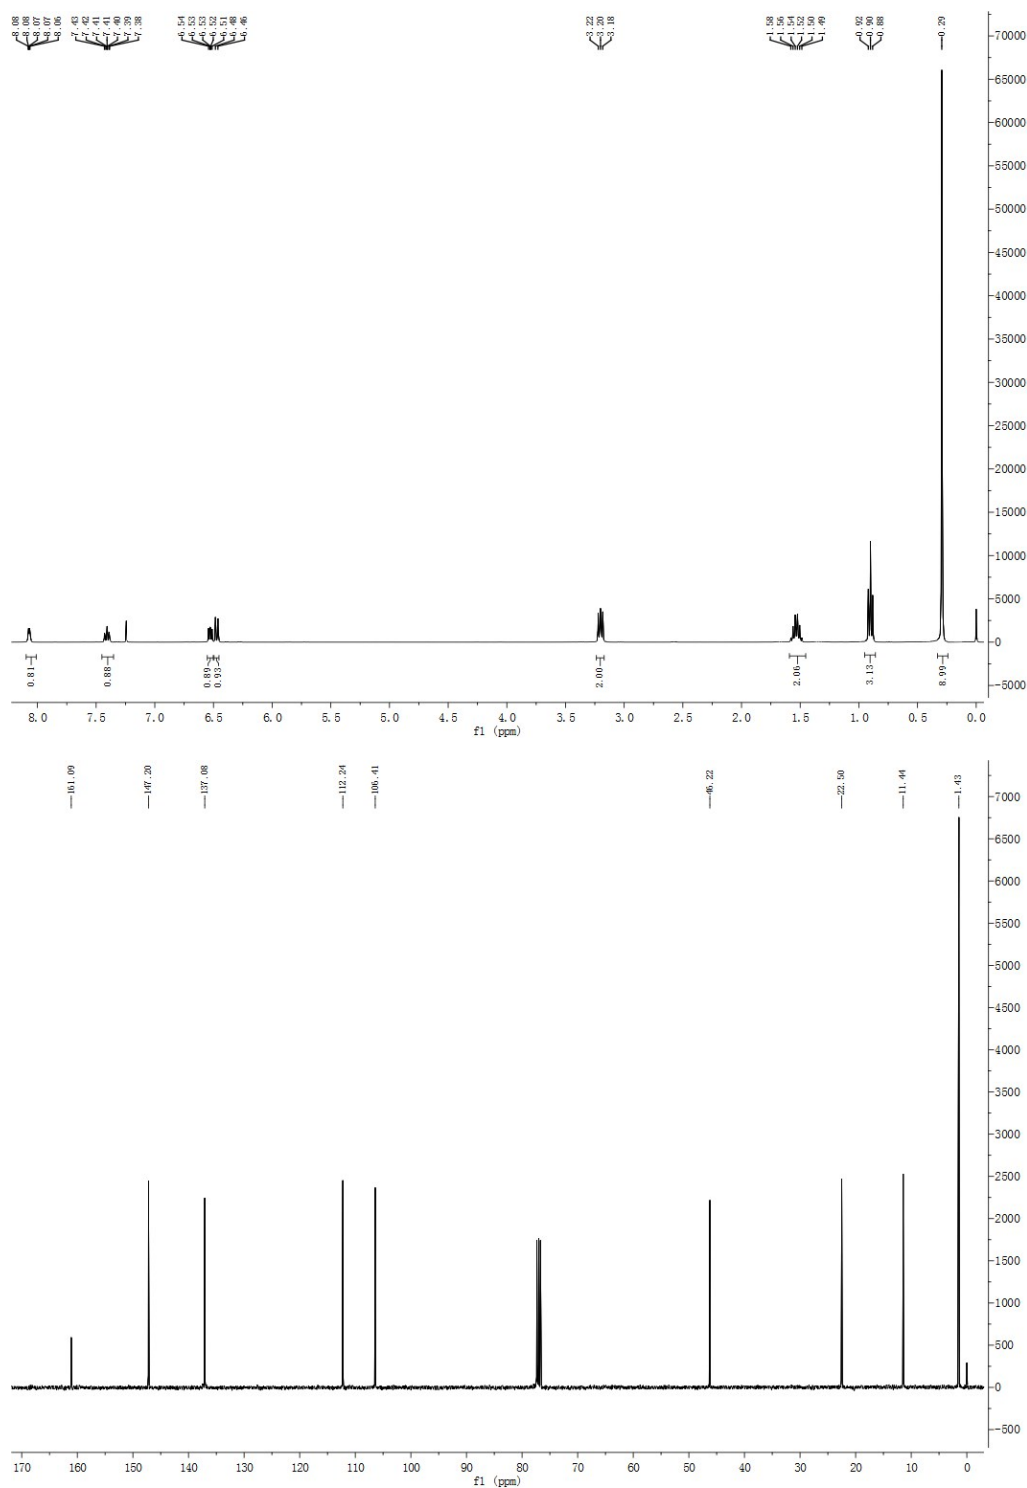

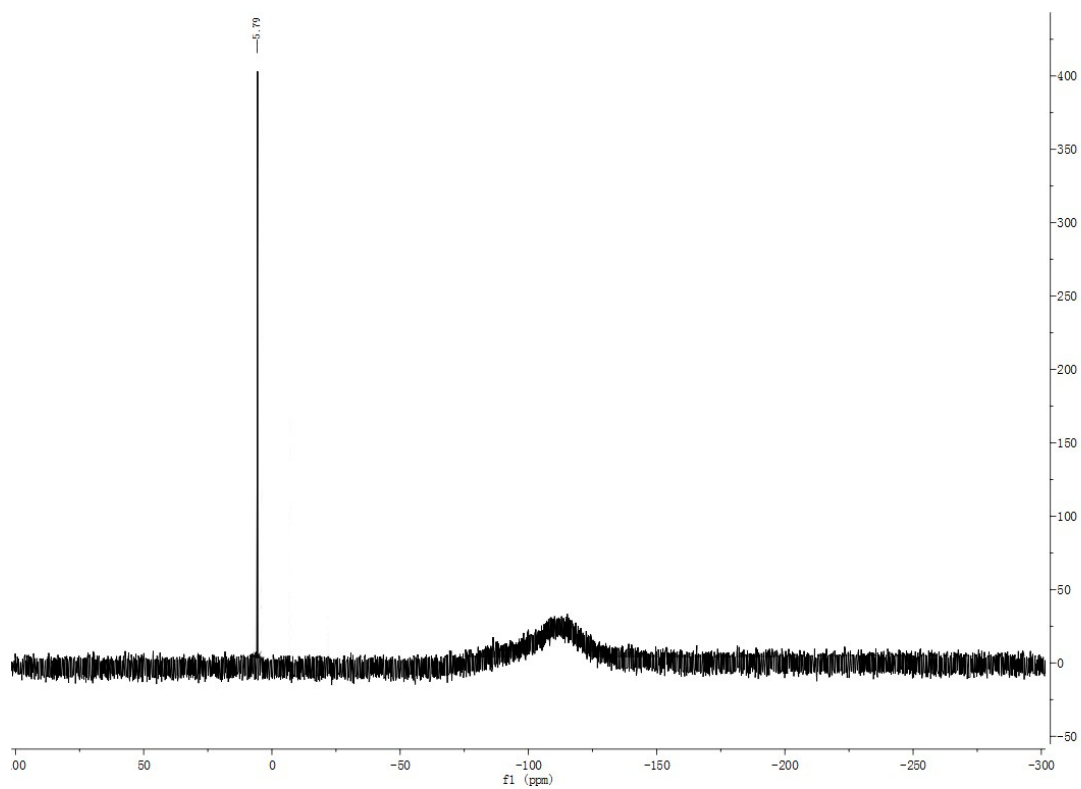

**2b:**

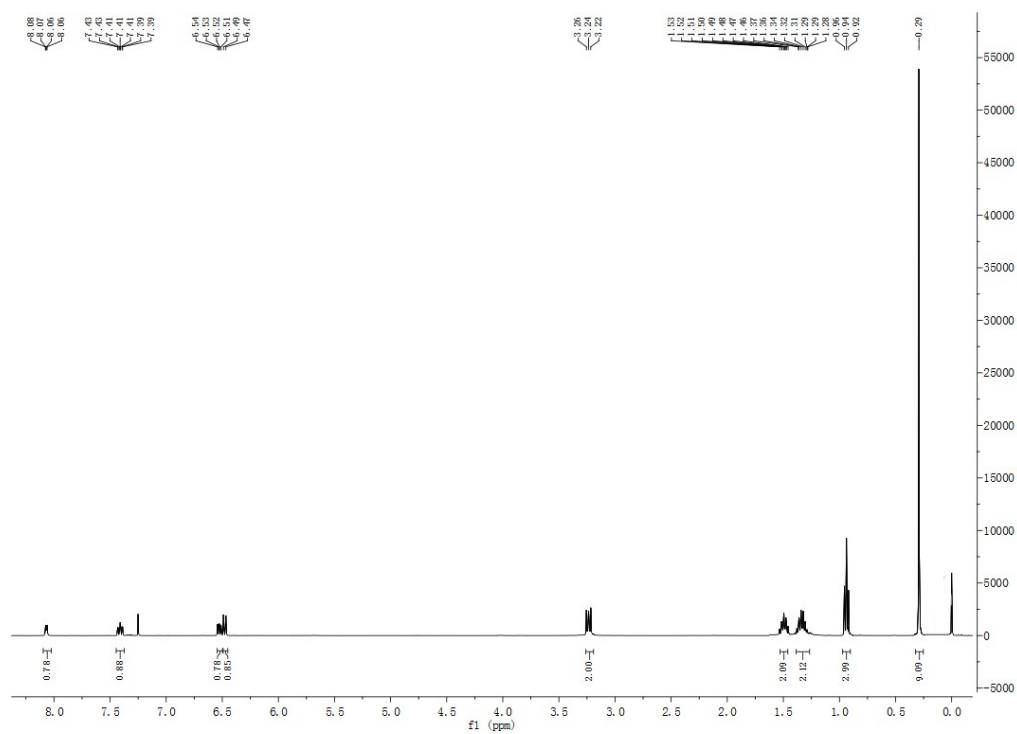

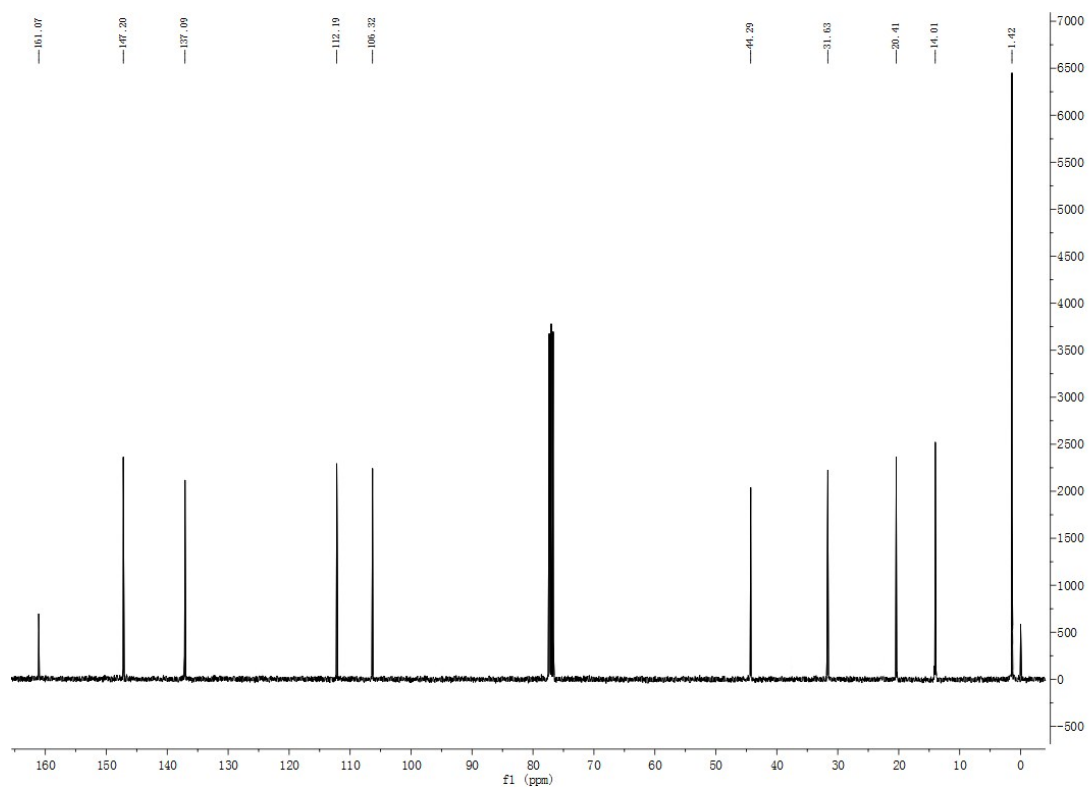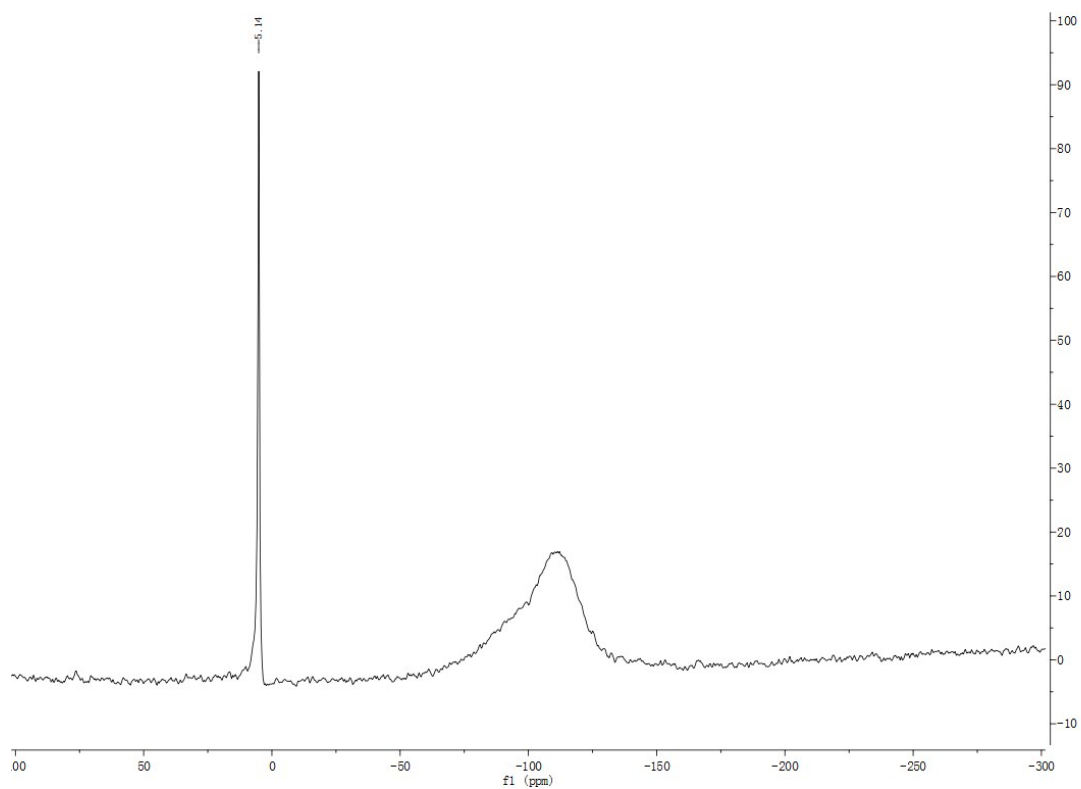

2c:

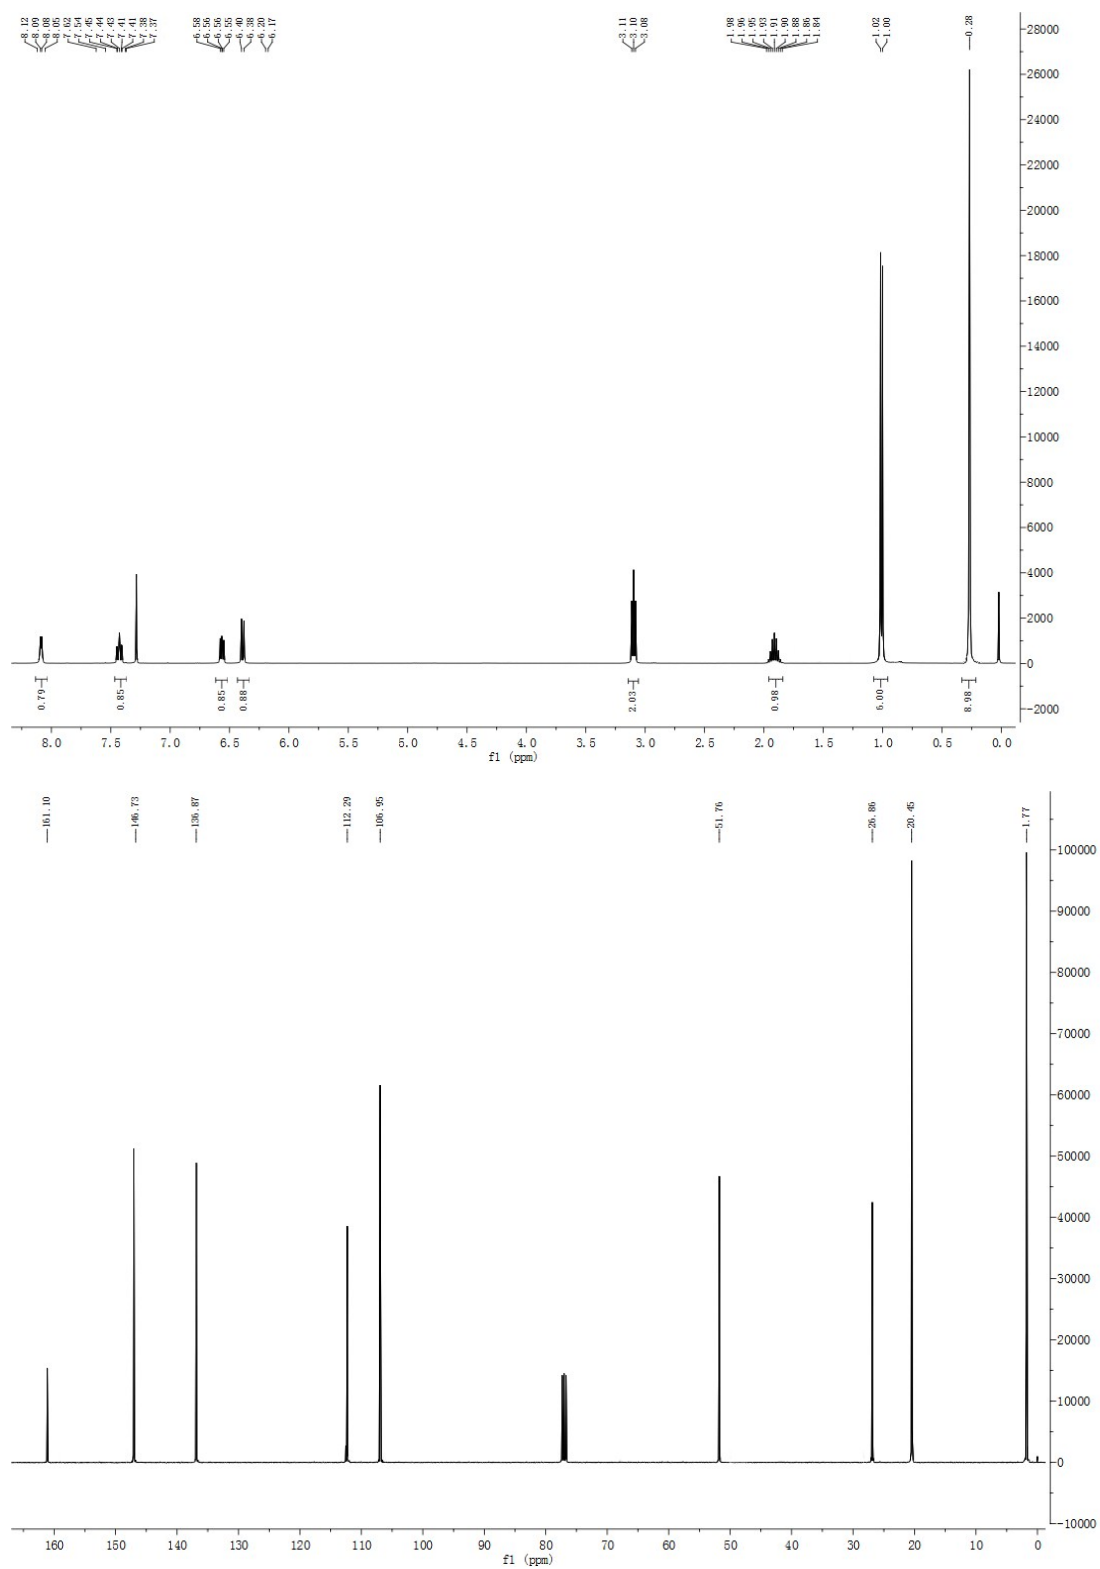

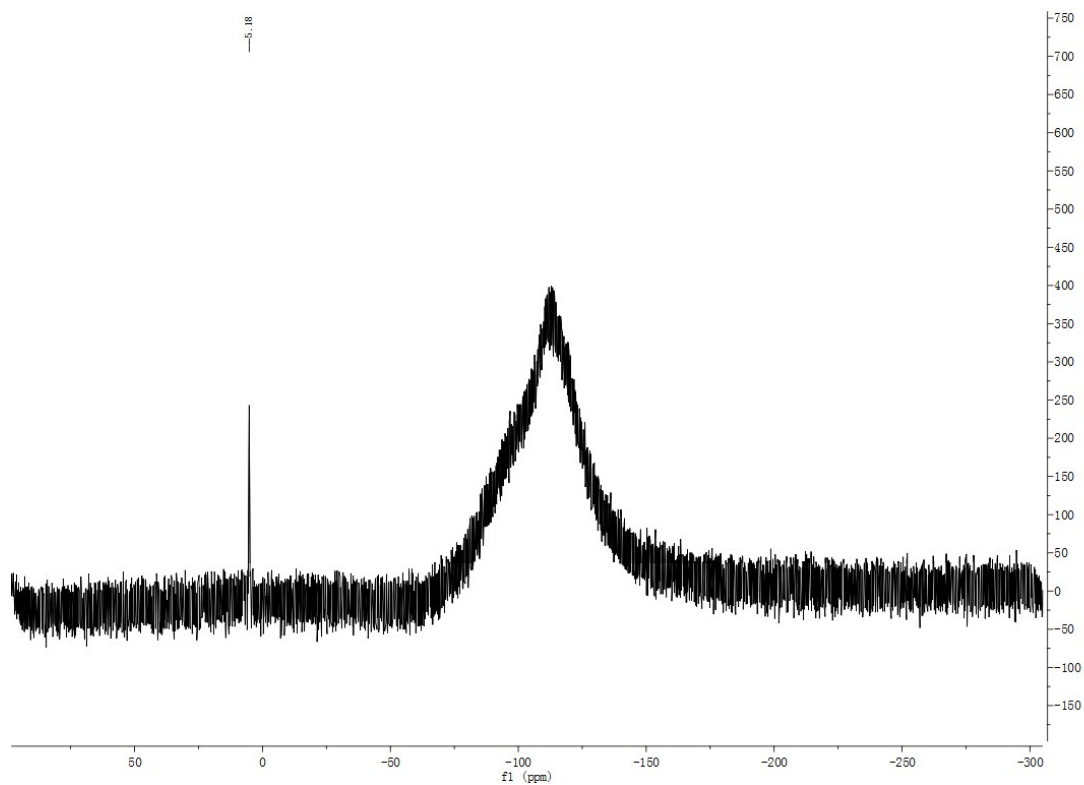

**2d:**

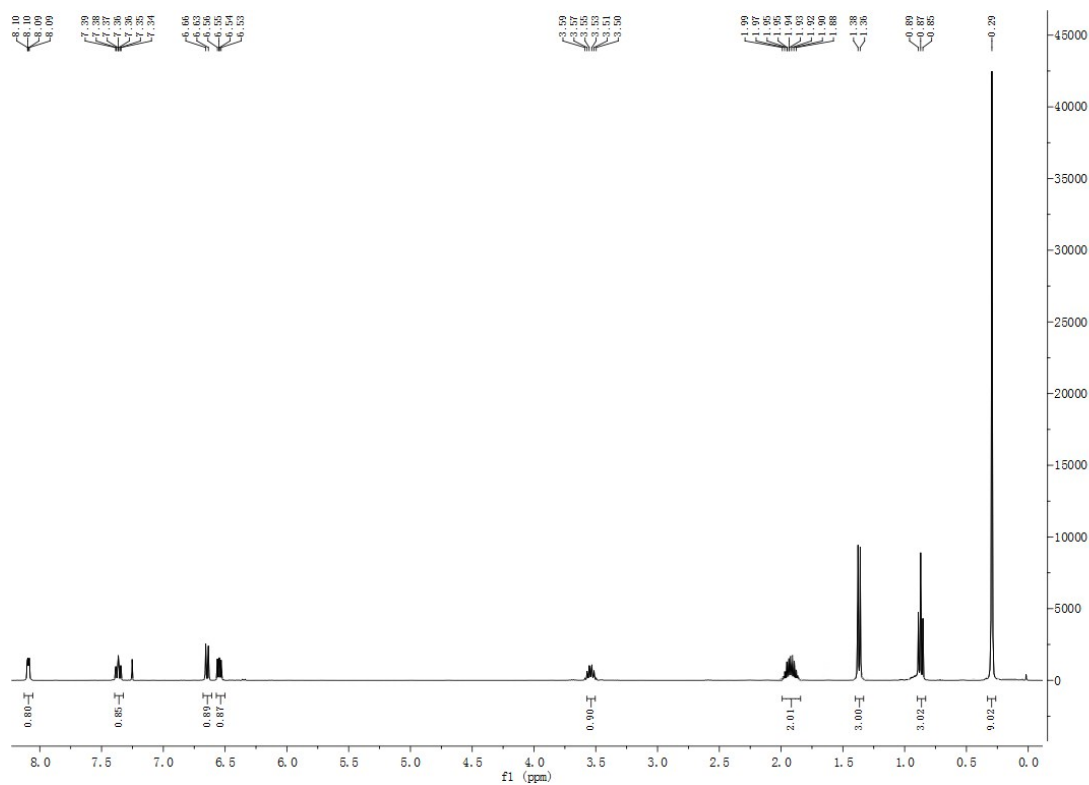

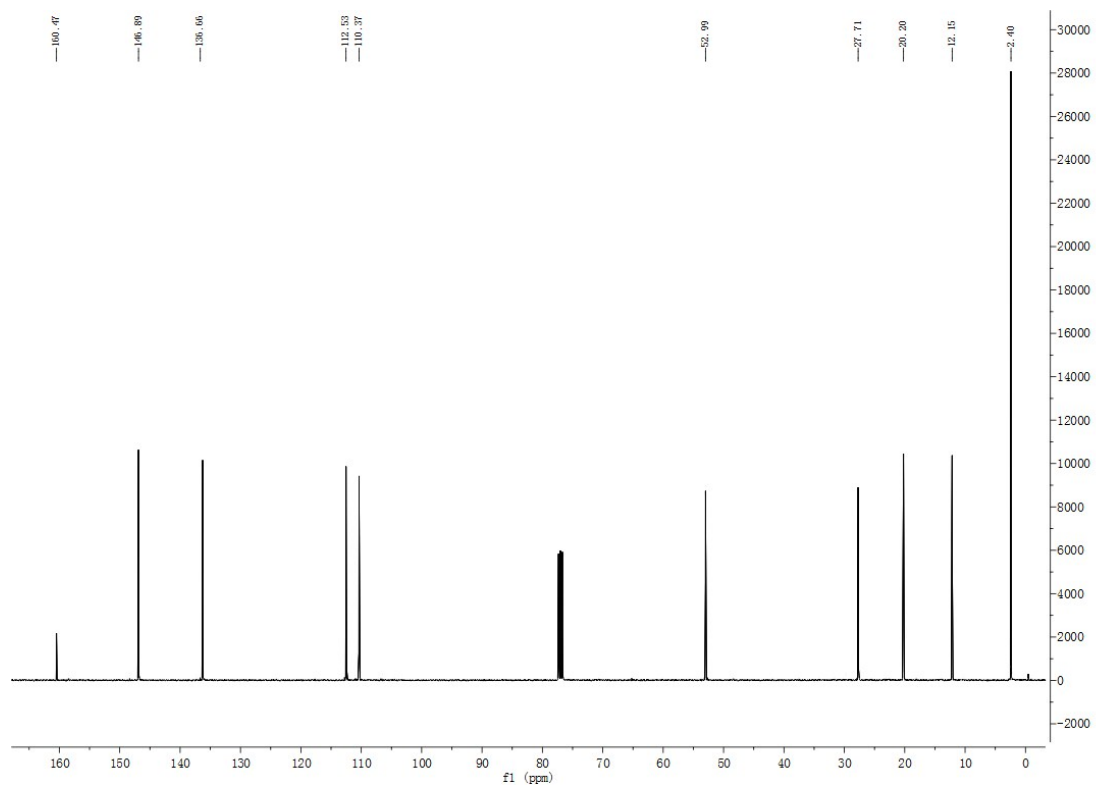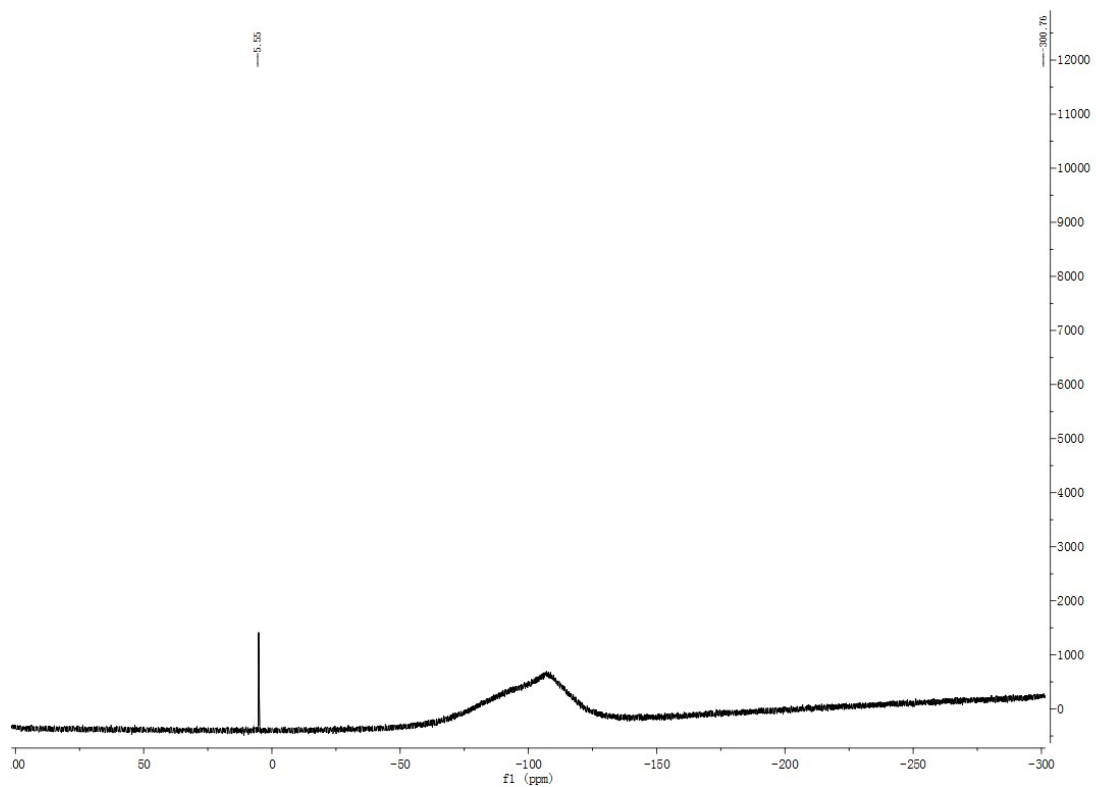

**2e:**

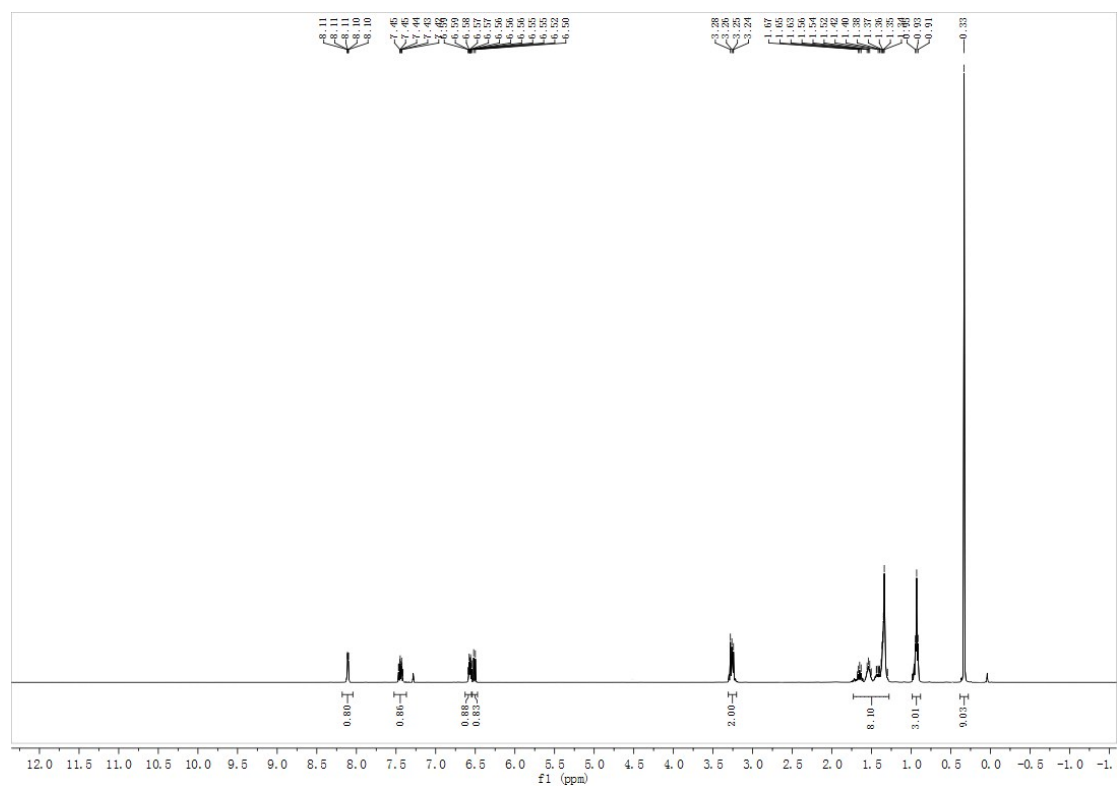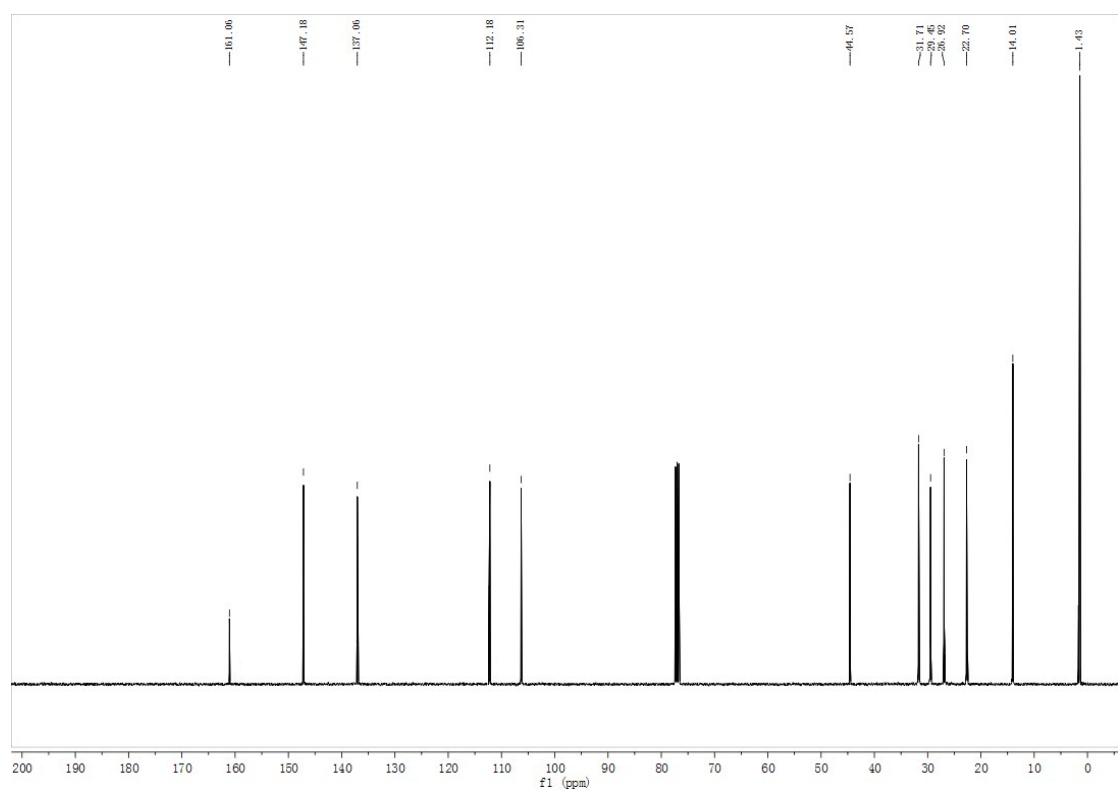

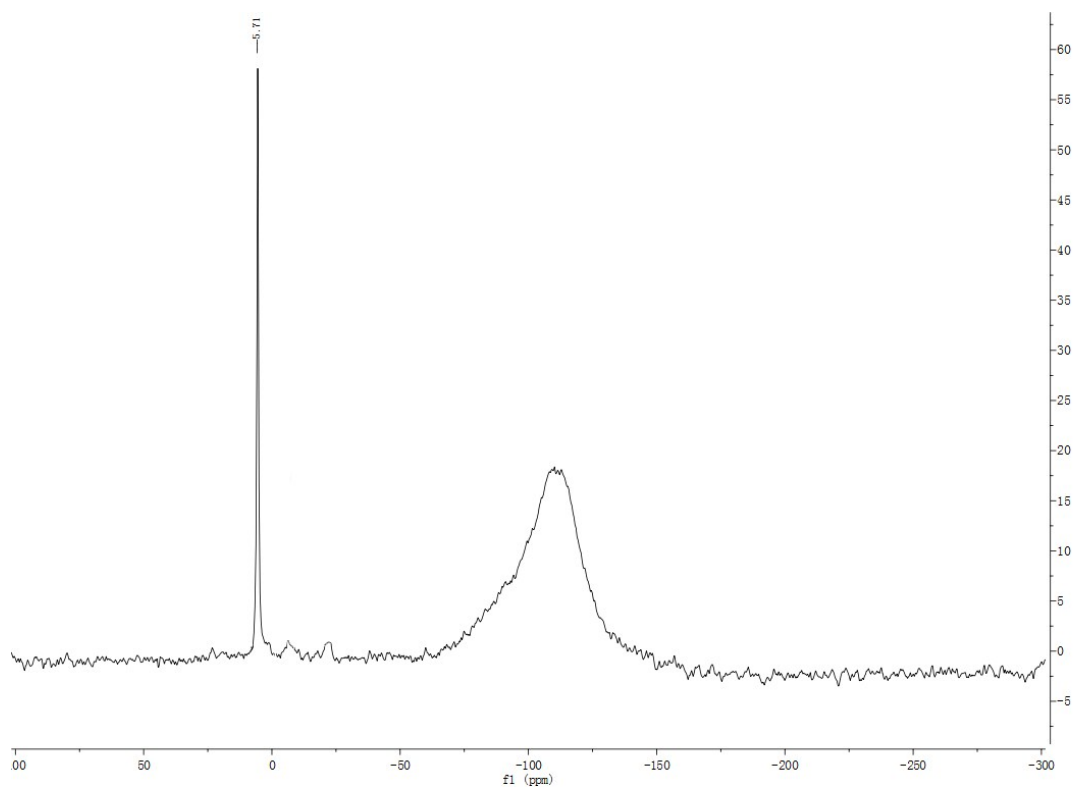

2f

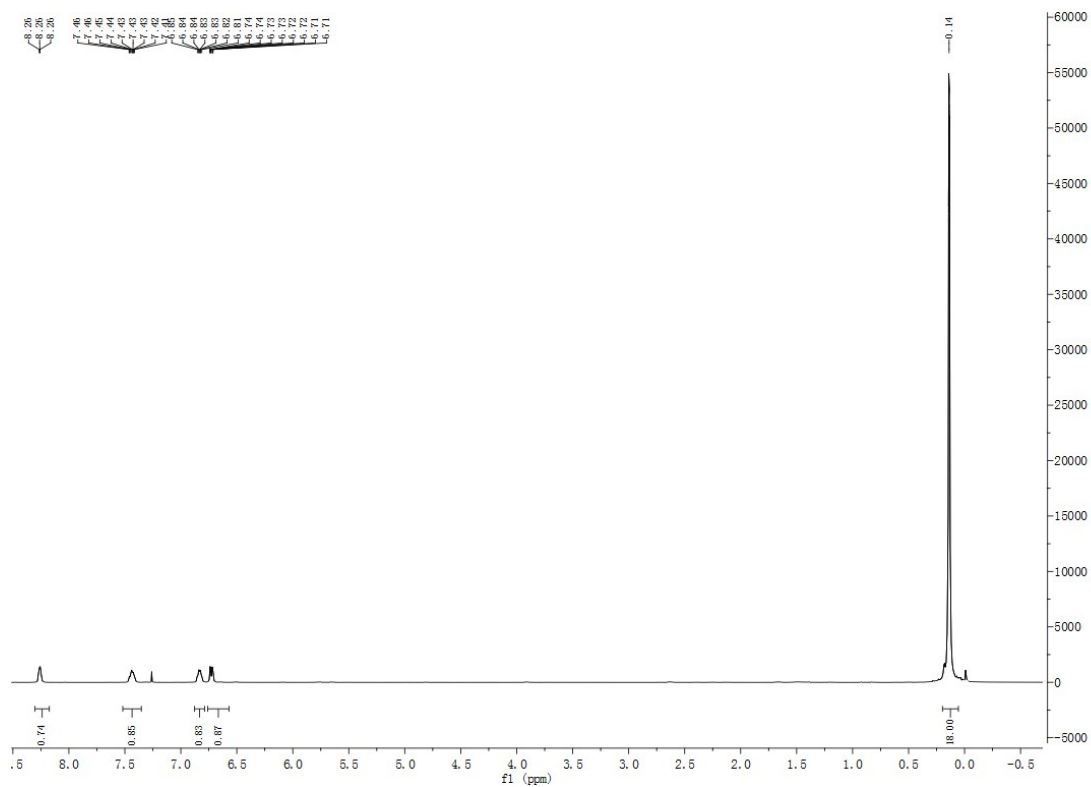



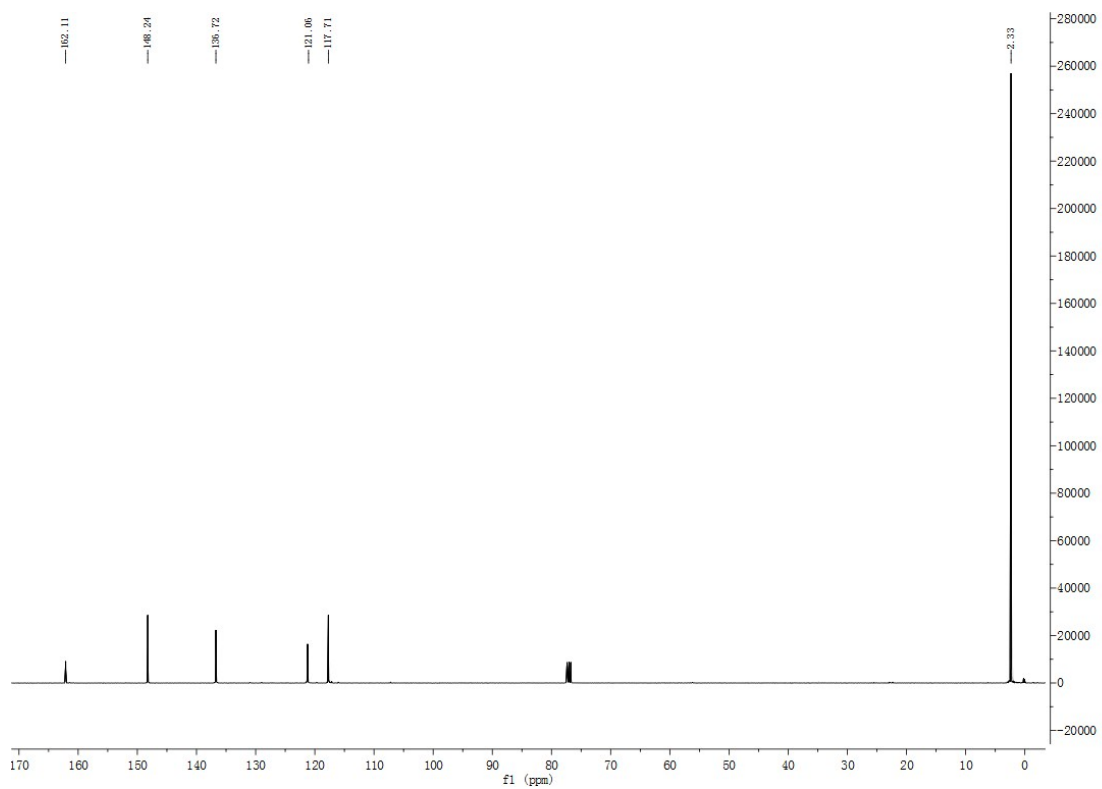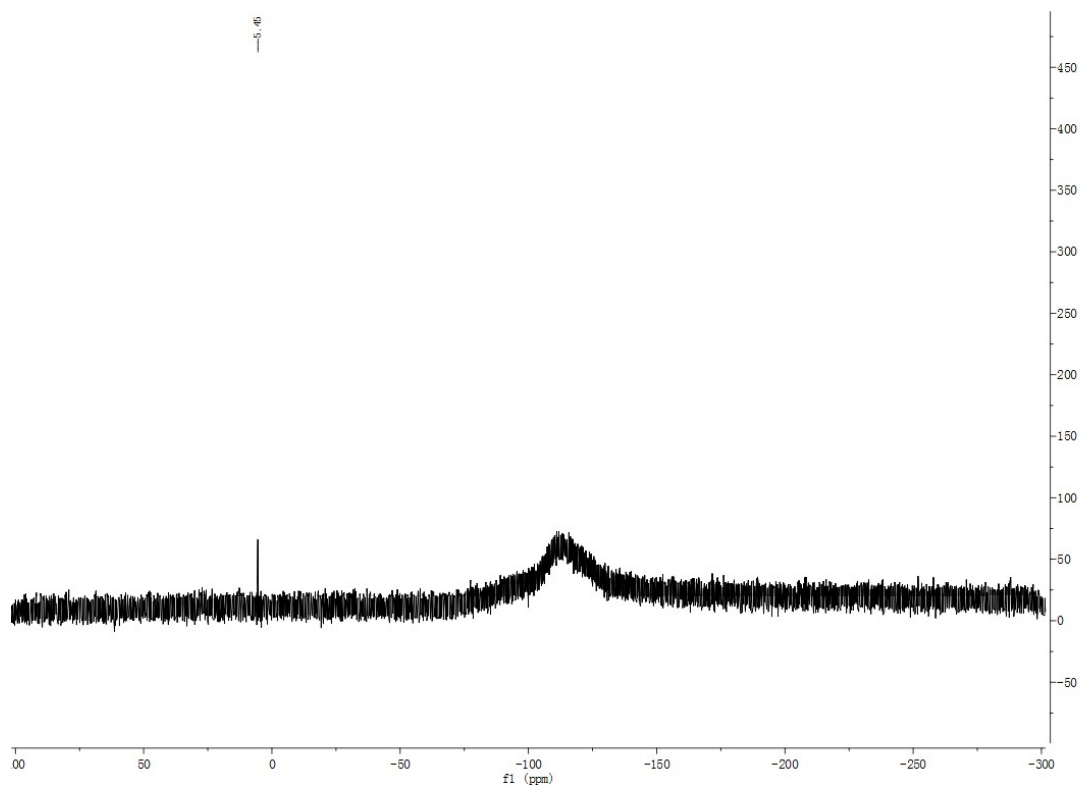

Narrow scans of C 1s, Si 2p, O 1s and their electron orbital spectra:

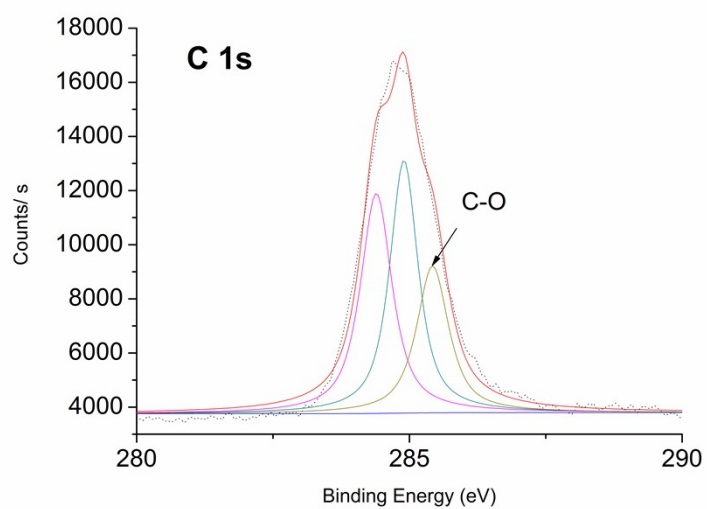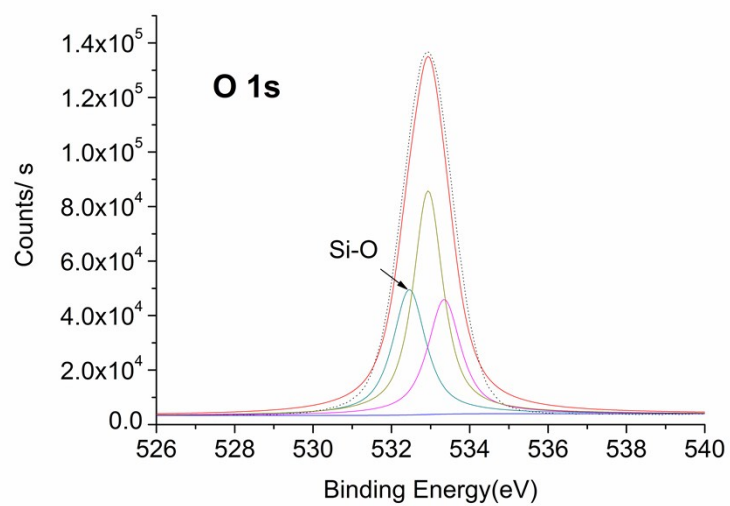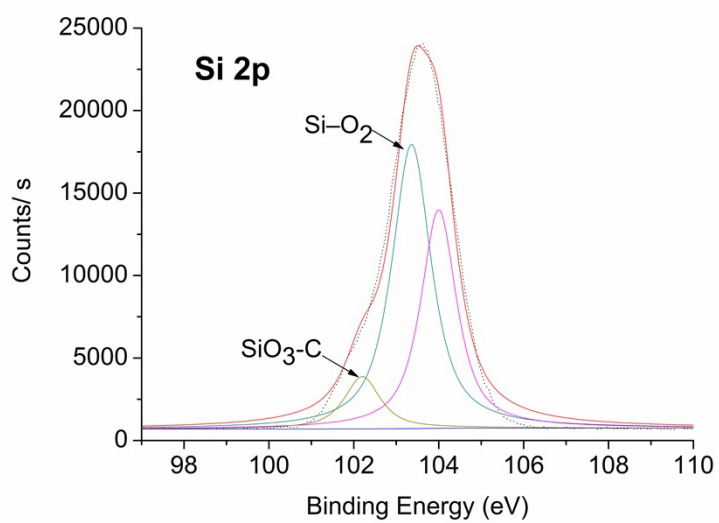

Supplement: c5ra07045g1.pdf [file c5ra07045g1.pdf]
